# Supplementary material for: IntelliPy: a GUI for analyzing IntelliCage data
Source: Oxford University Press journal article supplement (doi:10.1093/bioinformatics/btab682), 2021-09-30
Supplement: btab682_supplementary_data.zip [file btab682_supplementary_data.zip]

Archive with 2 entries (2 files):
- IntelliPy_ReadMe.pdf
- IntelliPy_Step-by-step (1).pdf
